# Supplementary material
Source: Royal Society of Chemistry journal article supplement (doi:10.1039/d6nj01082b)
Supplement: d6nj01082b1.pdf [file d6nj01082b1.pdf]

### Supplementary Information (SI)

#### Upcycling of Saline Lake Magnesium into Functionalized Si-MgO for Synergistic Fire-Safe PVC: A Waste-to-Wealth Strategy Coupling Catalytic Charring and Physical Insulation

The following is the supporting information of this paper. This supporting information aims to provide supplementary experimental details, data analysis methods and auxiliary results of the core research described in the text to ensure the repeatability of the research and the integrity of the data.

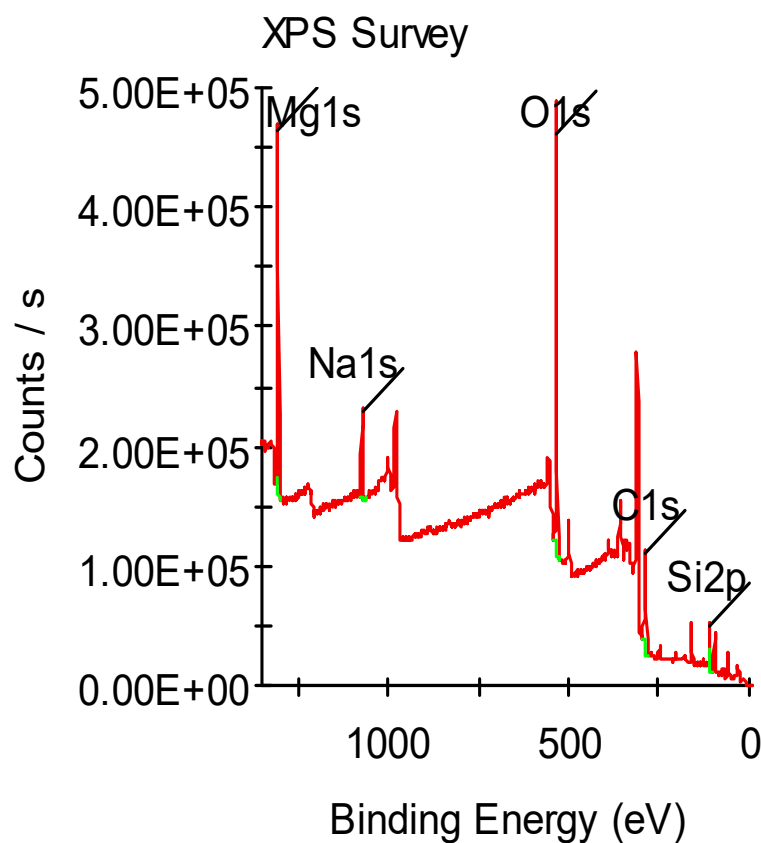

(S1) XPS data of Si-MgO

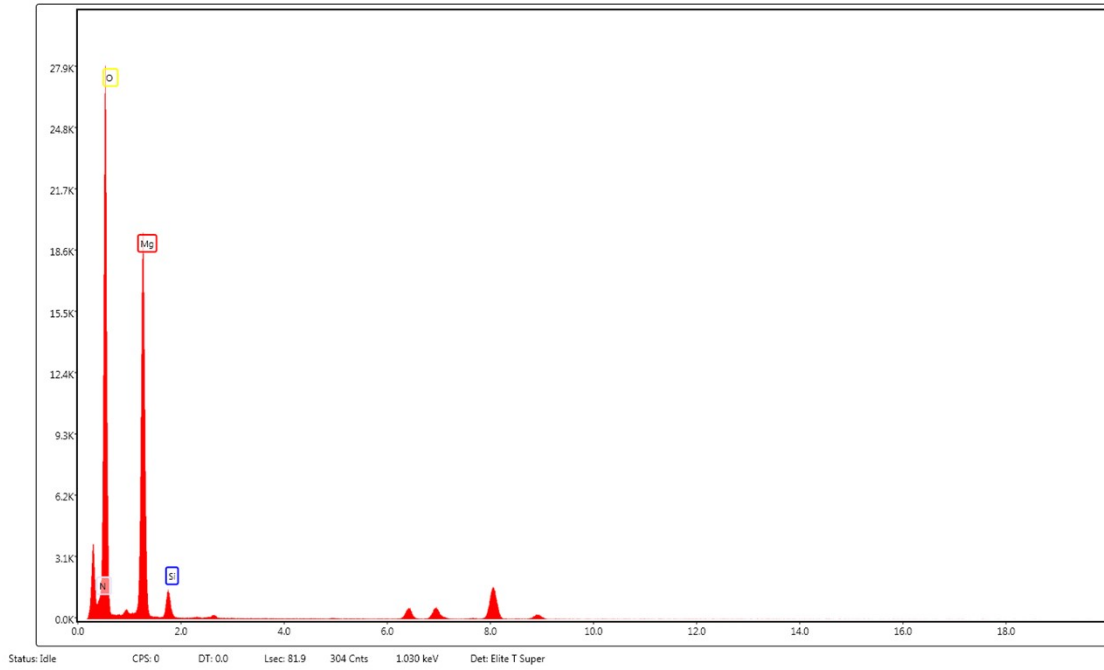

(S2) Si-MgO EDS element content analysis

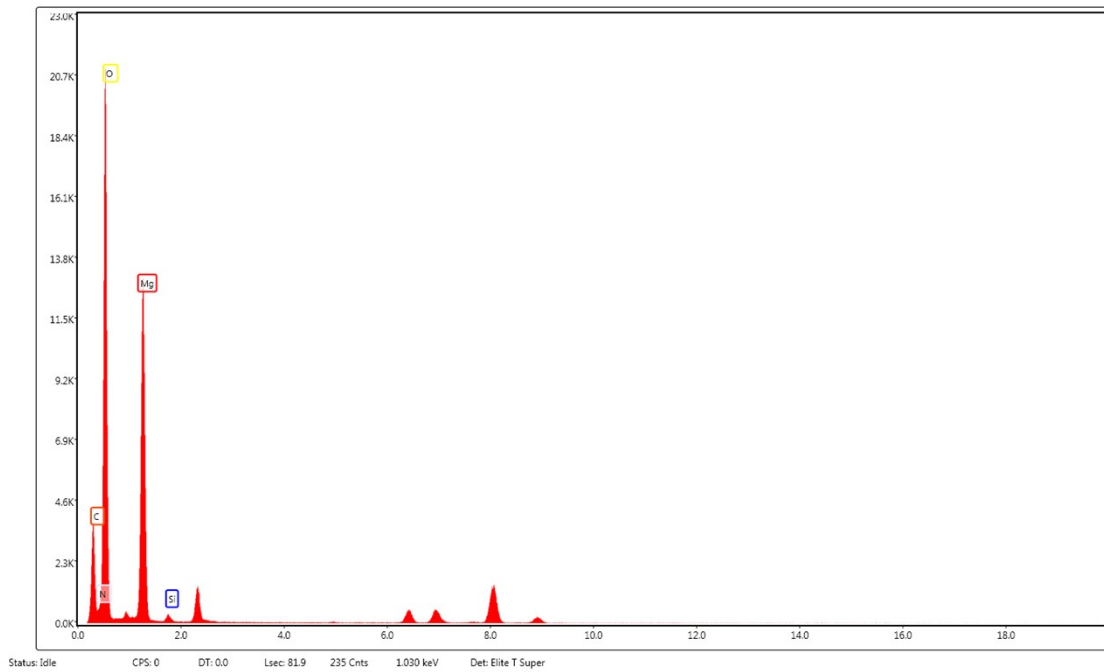

(S3) Si-MgO<sub>0.02</sub>-A-EG<sub>0.03</sub> EDS element content analysis

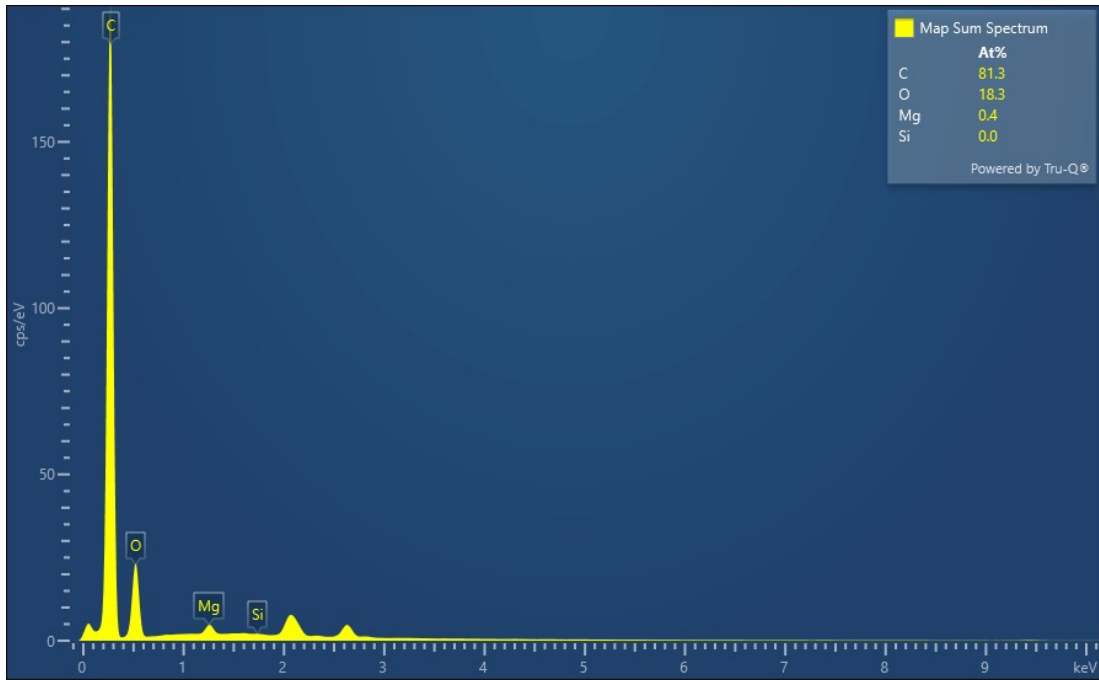

(S4) EDS residual carbon element content analysis of PVC

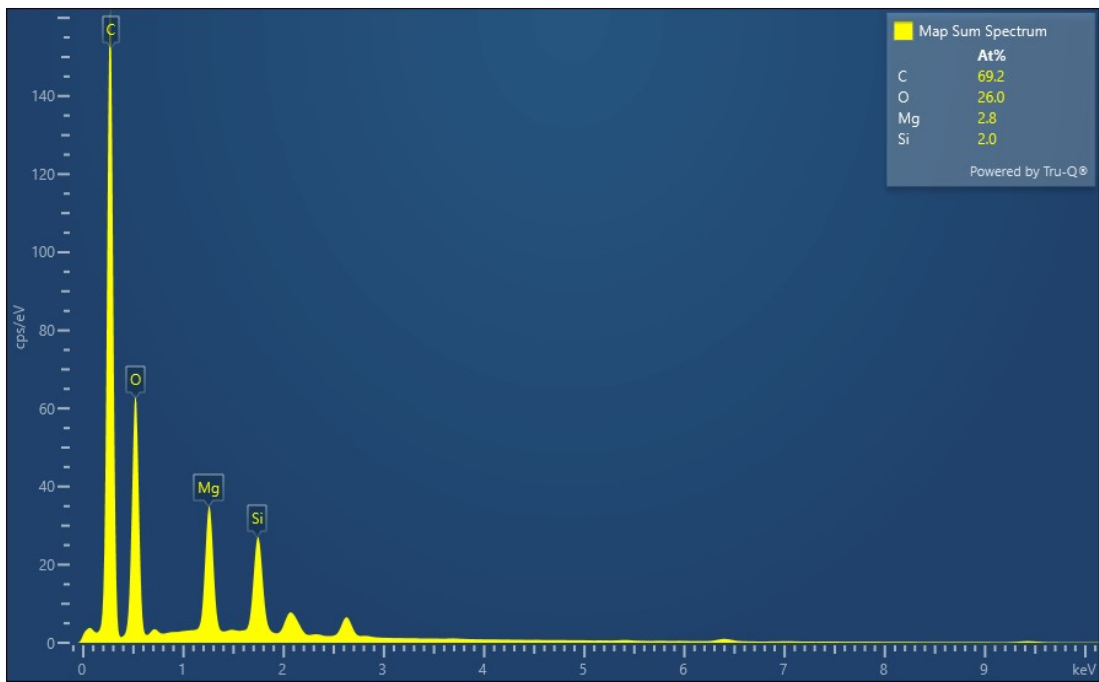

(S5) EDS residual carbon element content analysis of Si-MgO<sub>0.05</sub>/PVC

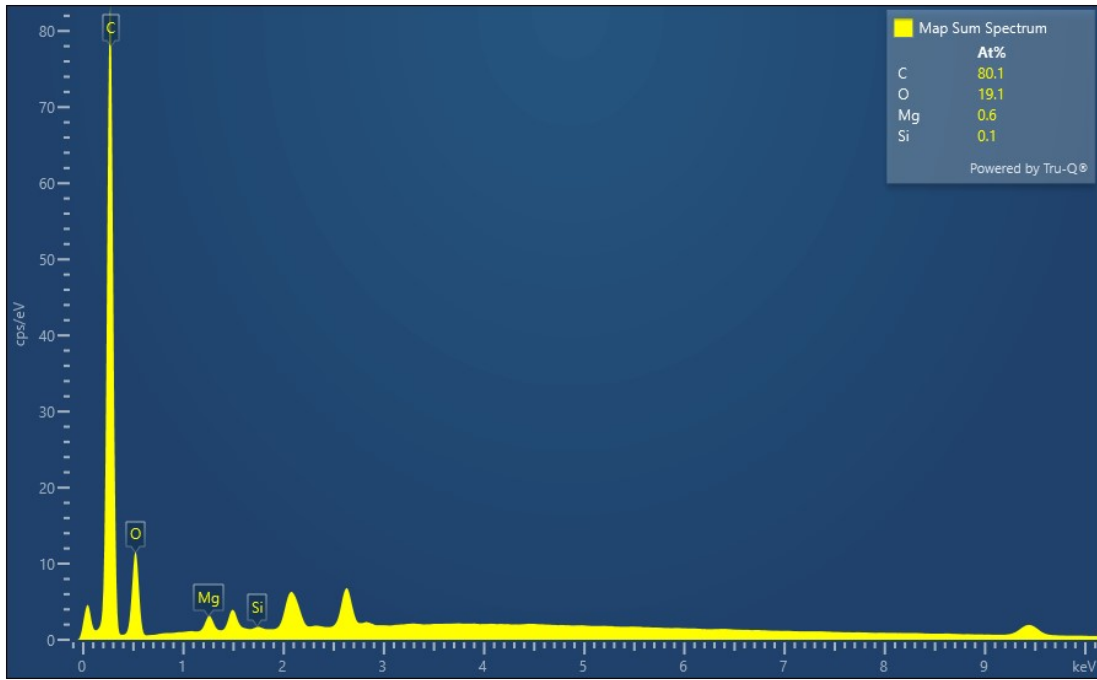

(S6) EDS residual carbon element content analysis of Si-MgO<sub>0.04</sub>-A-EG<sub>0.01</sub>/PVC

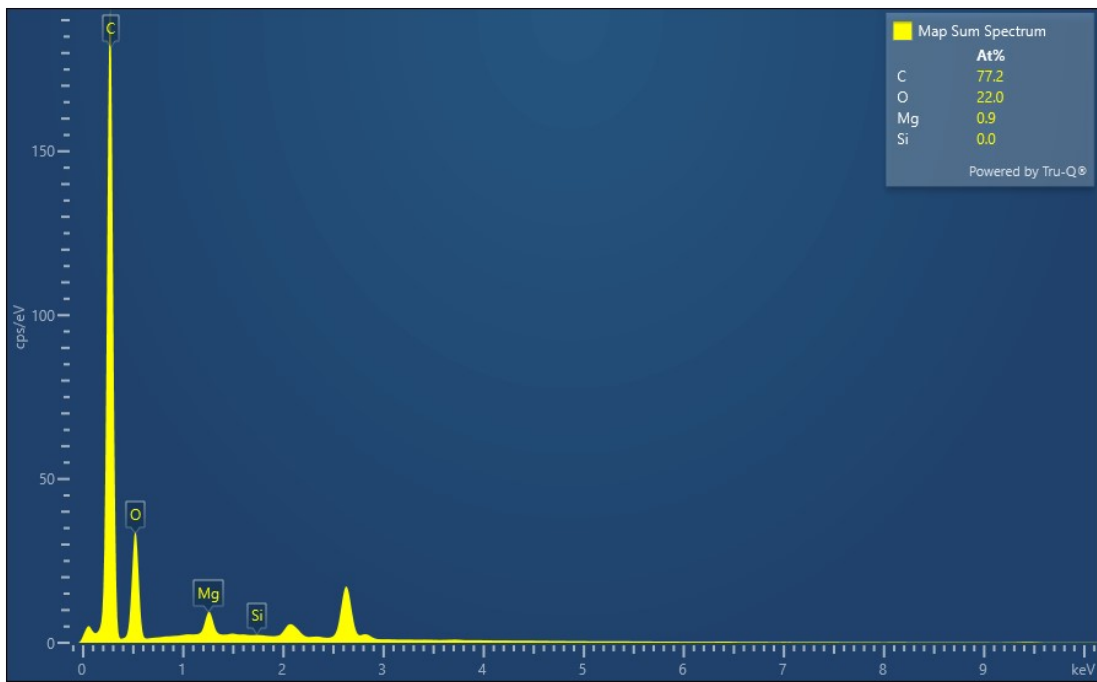

(S7) EDS residual carbon element content analysis of Si-MgO<sub>0.01</sub>-A-EG<sub>0.04</sub>/PVC

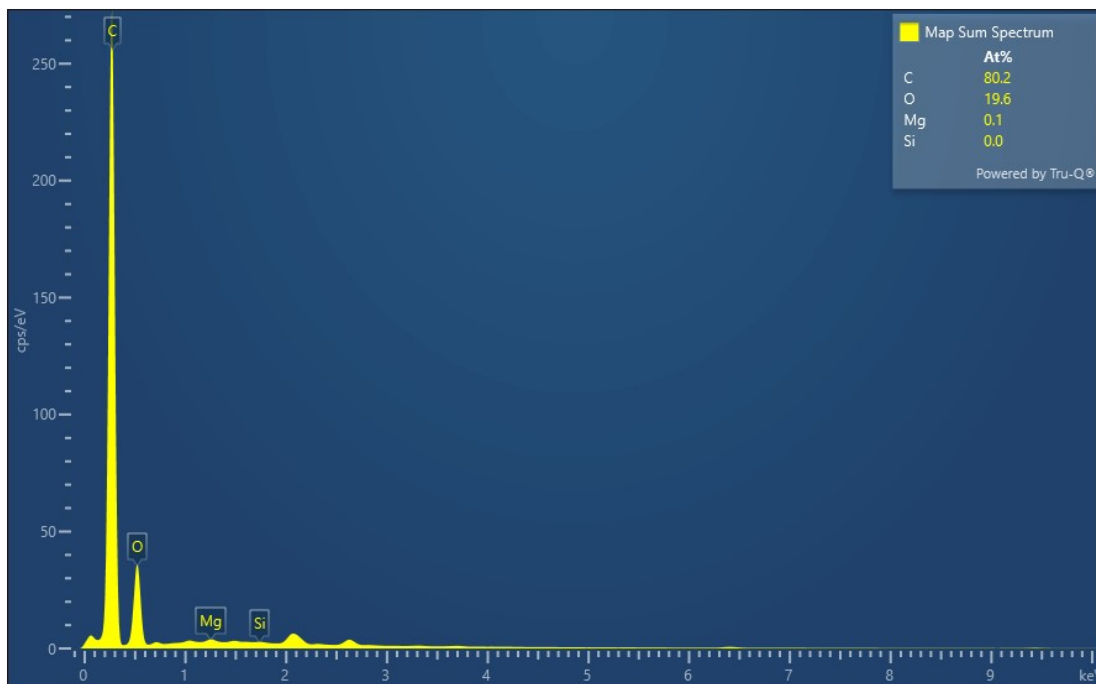

(S8) EDS residual carbon element content analysis of Si-MgO<sub>0.03</sub>-A-EG<sub>0.02</sub>/PVC

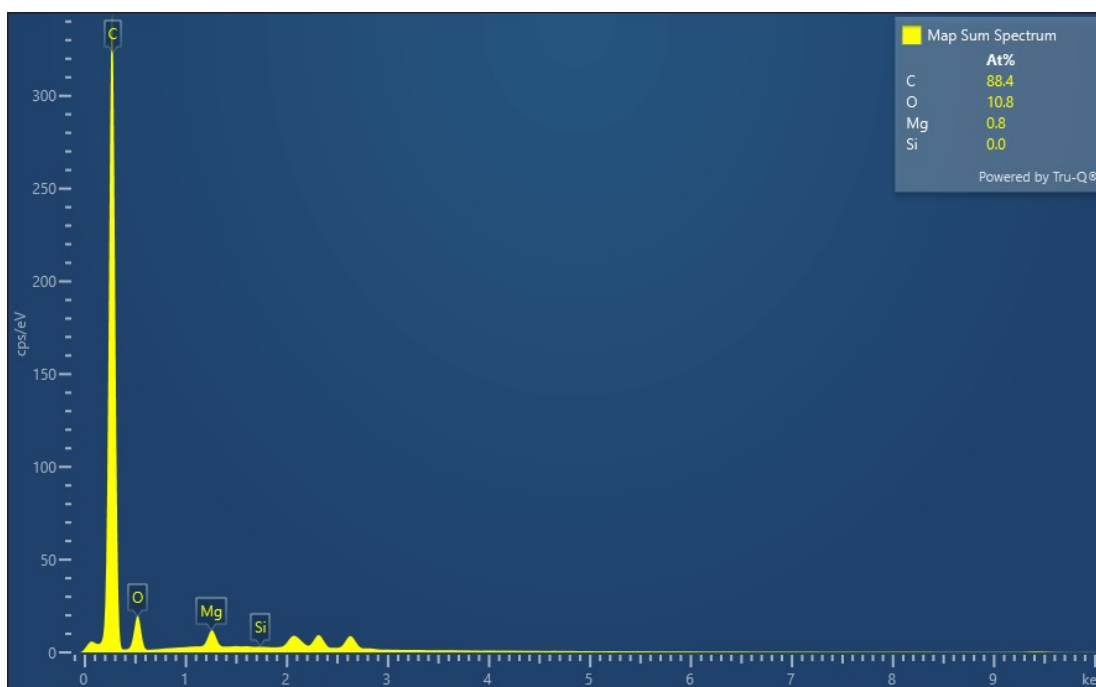

(S9) EDS residual carbon element content analysis of Si-MgO<sub>0.02</sub>-A-EG<sub>0.03</sub>/PVC

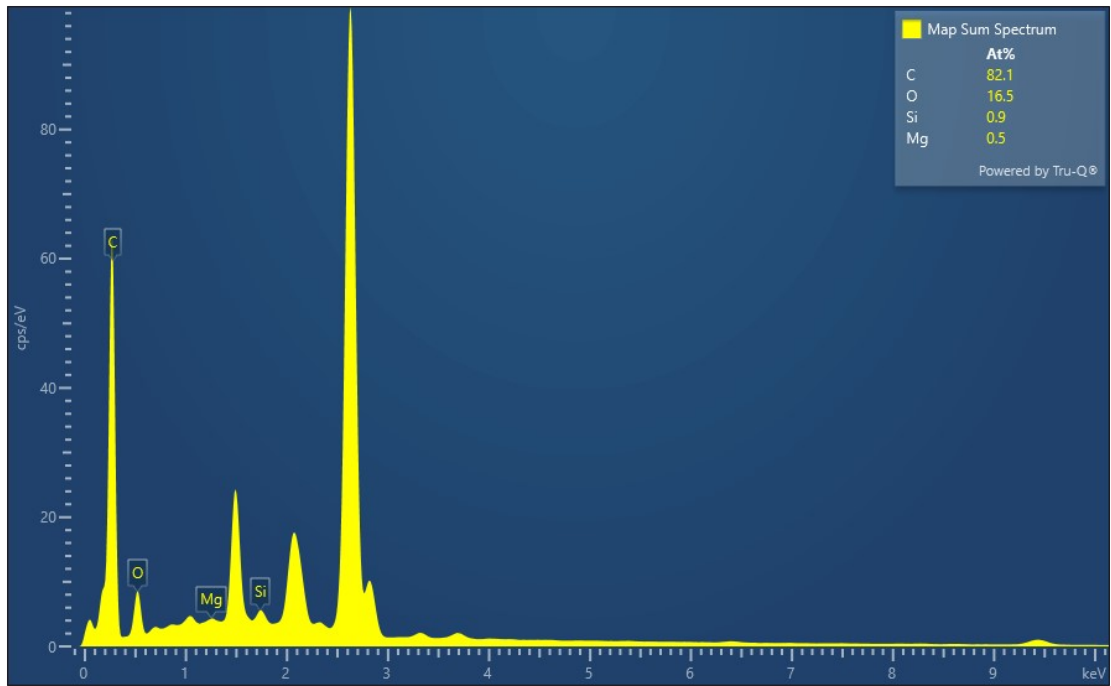

(S10) Analysis of EDS element content in cross section of PVC

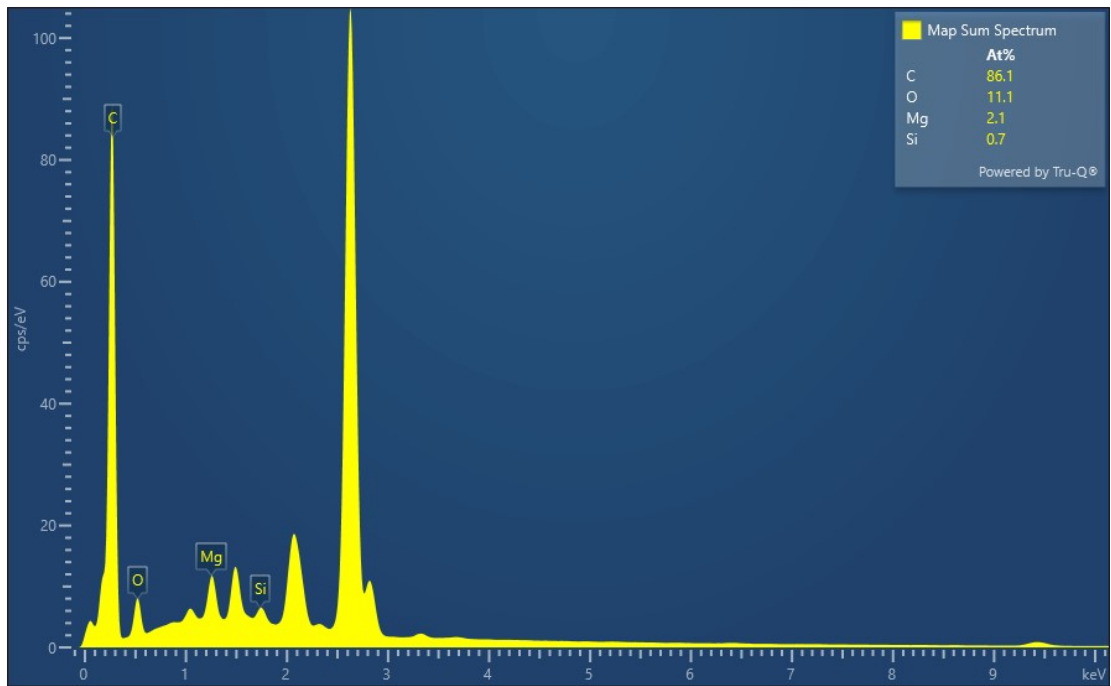

(S11) Analysis of EDS element content in cross section of MgO<sub>0.05</sub>/PVC

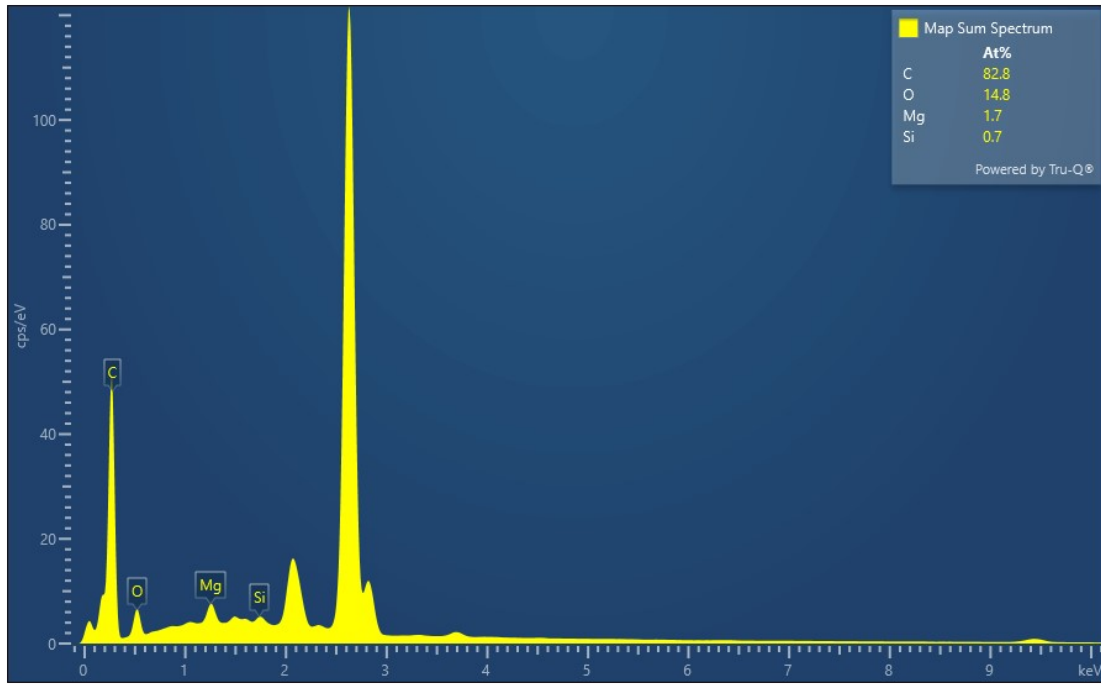

(S12) Analysis of EDS element content in cross section of Si-MgO<sub>0.05</sub>/PVC

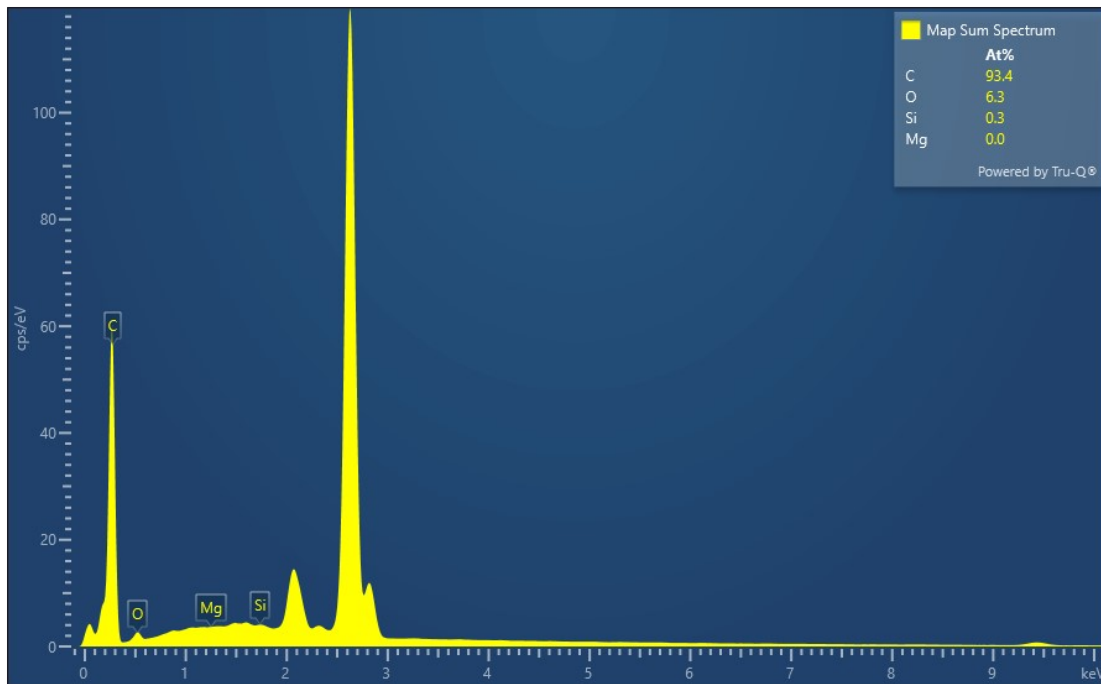

(S13) Analysis of EDS element content in cross section of EG<sub>0.05</sub>/PVC

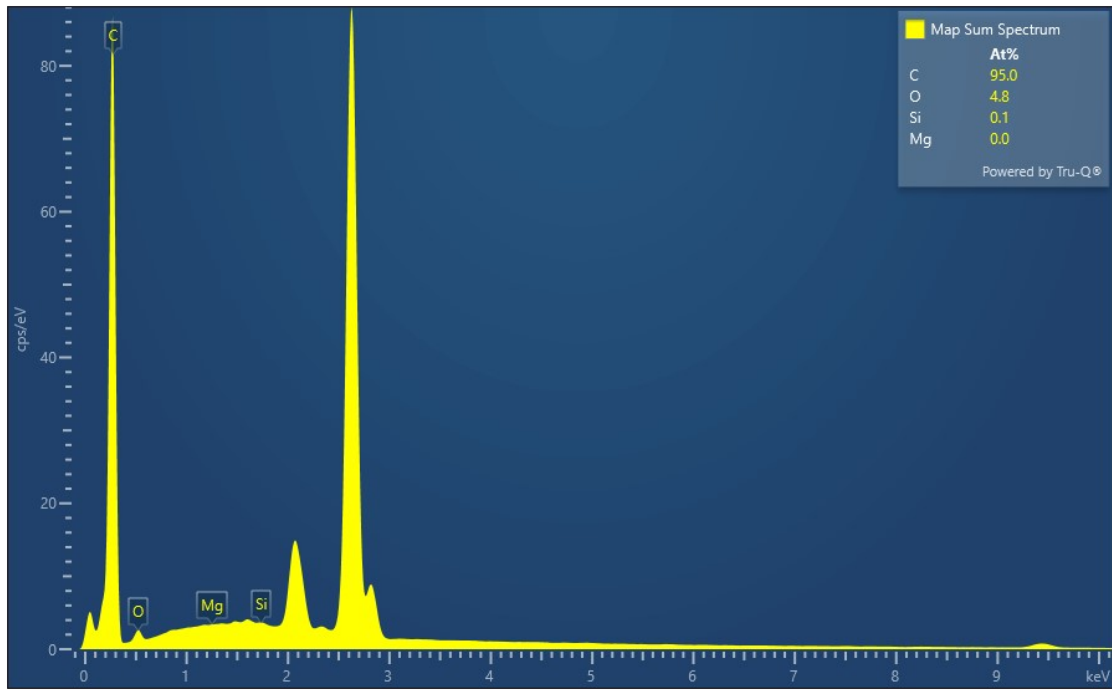

(S14) Analysis of EDS element content in cross section of A-EG<sub>0.05</sub>/PVC

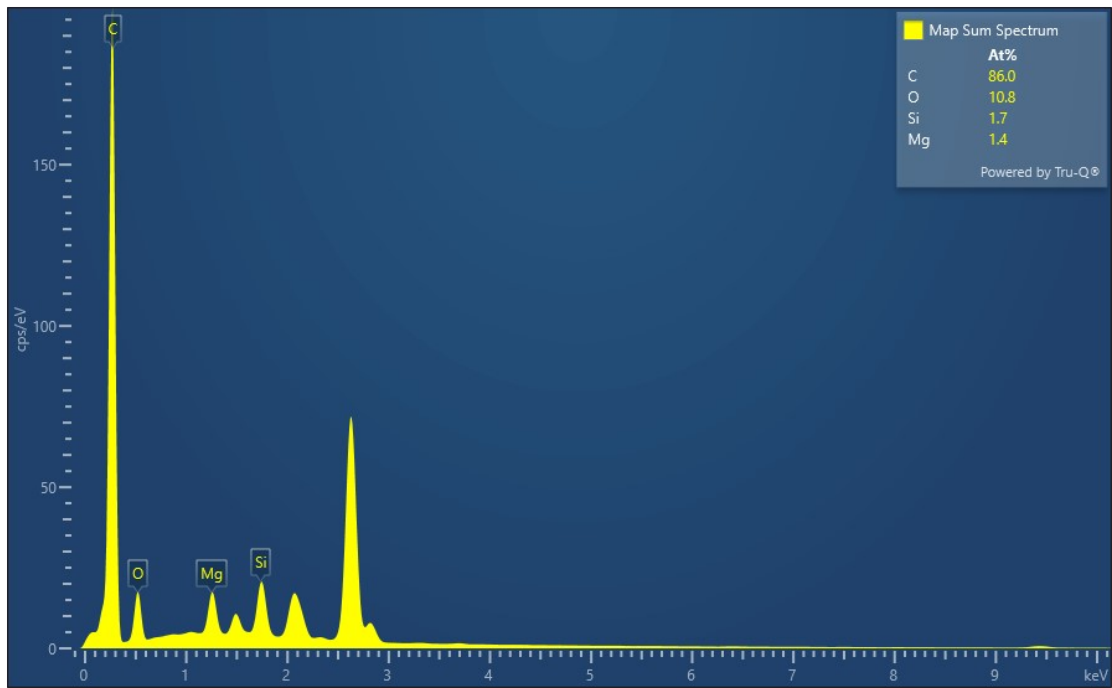

(S15) Analysis of EDS element content in cross section of Si-MgO<sub>0.02</sub>-A-EG<sub>0.03</sub>/PVC

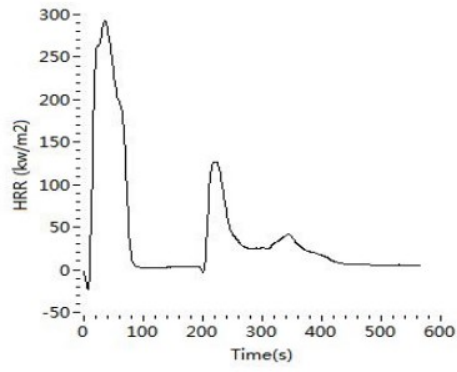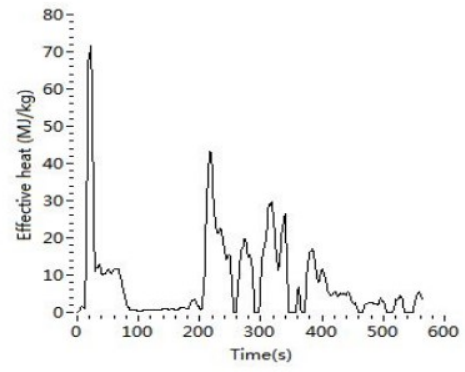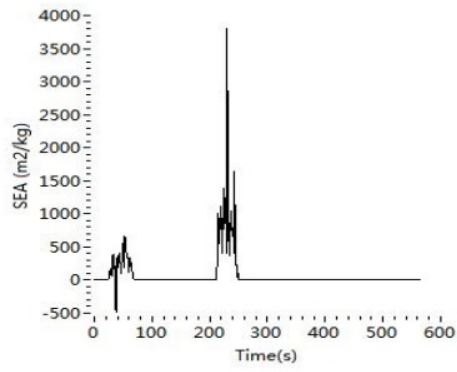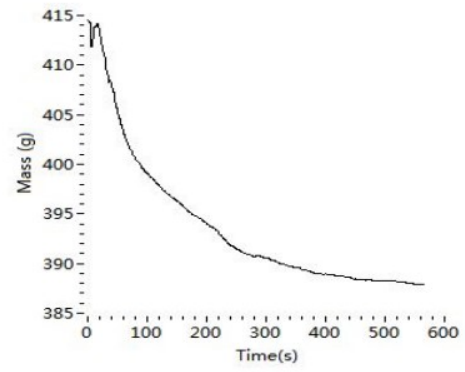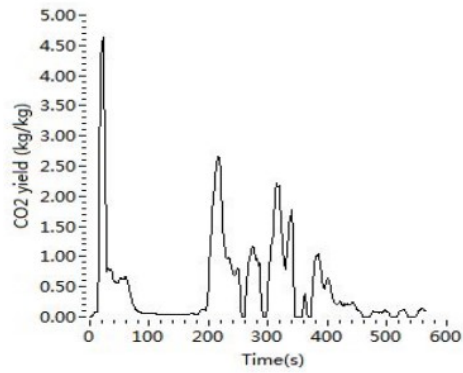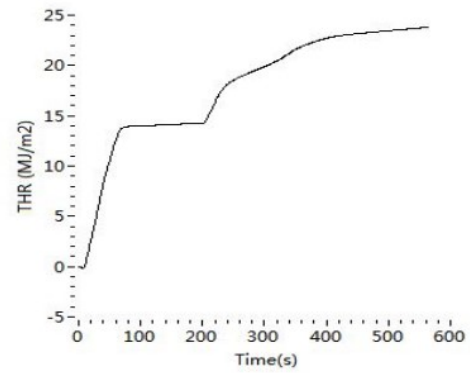

(S16) CCT test data of PVC

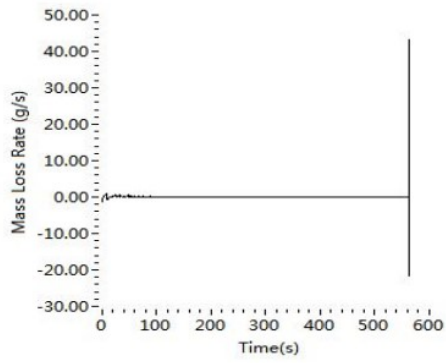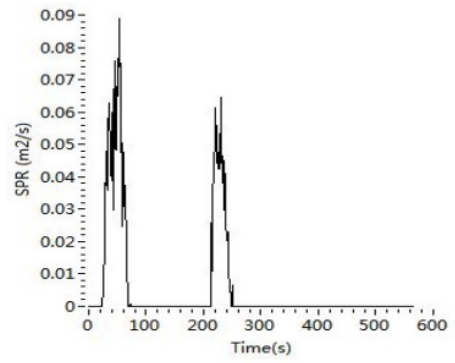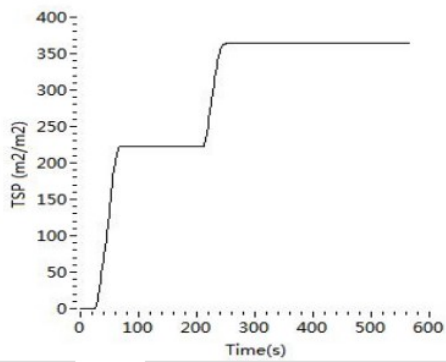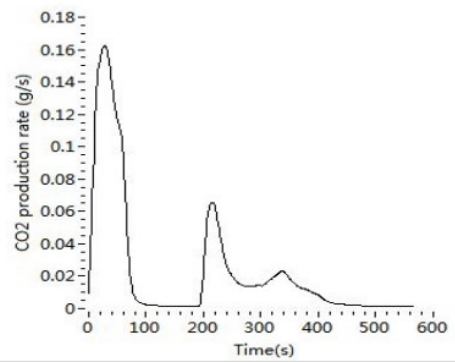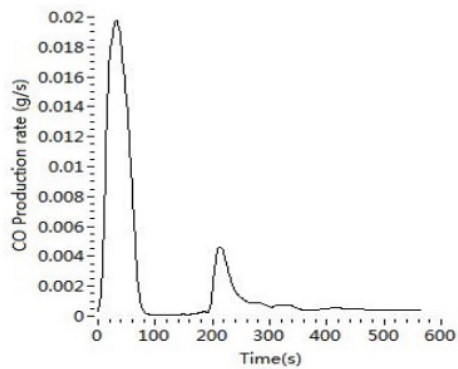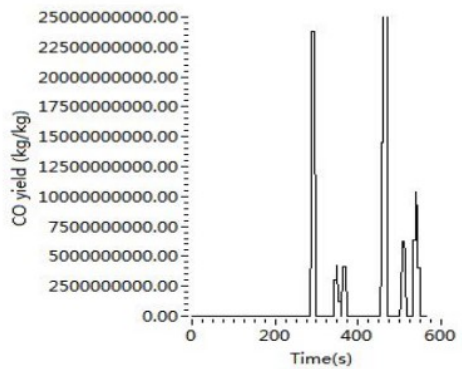

(S17) CCT test data of PVC

| 测试结果 (between 261 and 558s) |                                    | 平均值                           | 最大值     | 时间 (s)   |     |
|-----------------------------|------------------------------------|-------------------------------|---------|----------|-----|
| 总热释放量                       | 4.87 MJ/m <sup>2</sup>             | 热释放率 (kW/m <sup>2</sup> )     | 16.4941 | 42.4266  | 339 |
| 总耗氧量                        | 3.29g                              | 有效燃烧热 (MJ/kg)                 | 13.8318 | 105.6511 | 290 |
| 质量损失                        | 354.16g/m <sup>2</sup>             | 质量损失率 (g/(s·m <sup>2</sup> )) | 1.1925  | 6.416    | 308 |
| 平均质量损失率 (mA, 10-90)         | 1.38g/(s·m <sup>2</sup> )          | 比消光面积 (m <sup>2</sup> /kg)    | 0       | 0        | 261 |
| 烟总释放量                       | 0.00m <sup>2</sup> /m <sup>2</sup> | 二氧化碳产量 (kg/kg)                | 0.0496  | 0.0881   | 277 |
| 总产烟量                        | 0.00m <sup>2</sup>                 | 一氧化碳产量 (kg/kg)                | 0.7831  | 2.2168   | 331 |
| MARHE                       | 208.73kW/m <sup>2</sup>            |                               |         |          |     |

| 测试数据                          | 1 min   | 2 min   | 3 min   | 4 min   | 5 min   | 0s-261s  | 261s-558s |
|-------------------------------|---------|---------|---------|---------|---------|----------|-----------|
| 从试样点燃到结束...                   |         |         |         |         |         |          |           |
| 热释放率 (kW/m <sup>2</sup> )     | 26.4812 | 29.0511 | 23.542  | 19.1316 | 16.3759 | 72.2598  | 16.237    |
| 有效燃烧热 (MJ/kg)                 | 14.2323 | 15.093  | 15.0791 | 14.3704 | 13.5764 | 7.1002   | 13.6163   |
| 质量损失率 (g/(s·m <sup>2</sup> )) | 1.8606  | 1.9248  | 1.5612  | 1.3313  | 1.2062  | 10.1771  | 1.1925    |
| 比消光面积 (m <sup>2</sup> /kg)    | 0       | 0       | 0       | 0       | 0       | 137.2054 | 0         |
| 二氧化碳产量 (kg/kg)                | 0.0464  | 0.0378  | 0.0433  | 0.0471  | 0.0489  | 0.0445   | 0.0004    |
| 一氧化碳产量 (kg/kg)                | 0.9263  | 0.9477  | 0.9128  | 0.8418  | 0.7676  | 0.4622   | 0.0063    |

| 产烟结果                     |                                     |
|--------------------------|-------------------------------------|
| 烟总量: 无火焰阶段 (0s-261s)     | 364.4m <sup>2</sup> /m <sup>2</sup> |
| 烟总量: 有火焰燃烧阶段 (261s-499s) | 0.0m <sup>2</sup> /m <sup>2</sup>   |
| 烟总量: 整个测试阶段 (0s-558s)    | 364.4m <sup>2</sup> /m <sup>2</sup> |

(S18) CCT test data of PVC

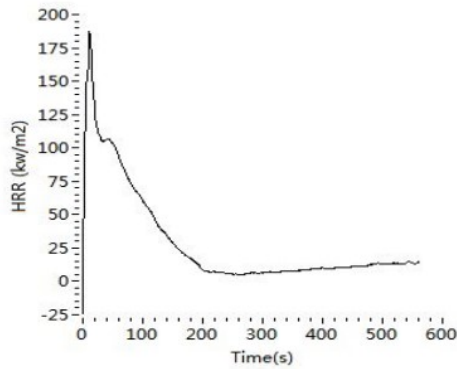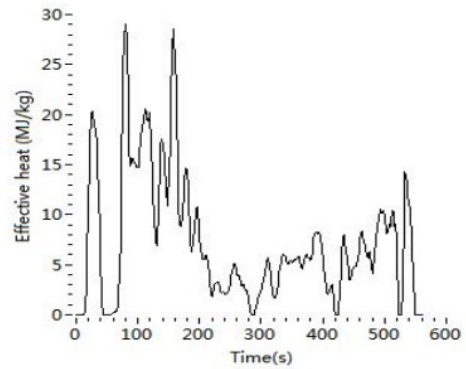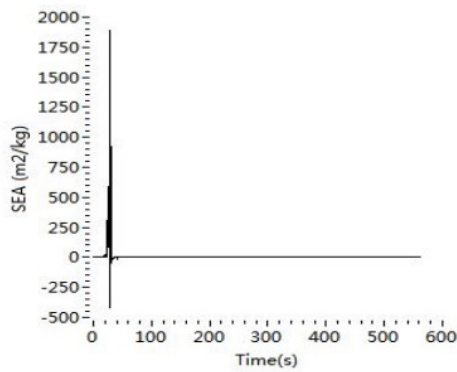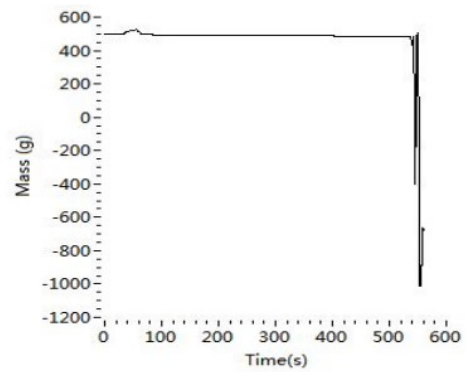

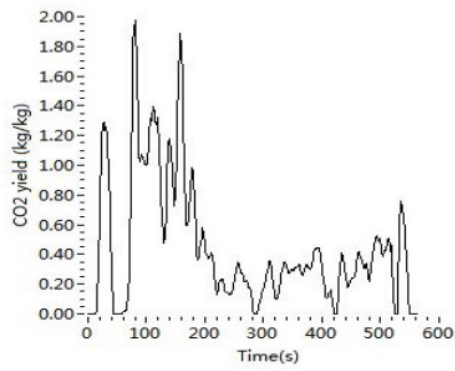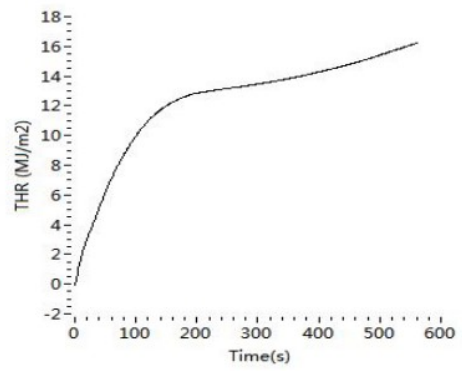

(S19) CCT test data of Si-MgO<sub>0.02</sub>-A-EG<sub>0.03</sub>/PVC

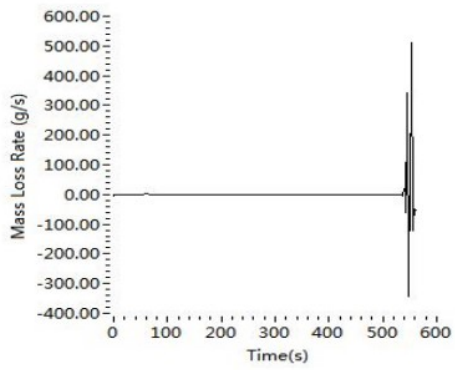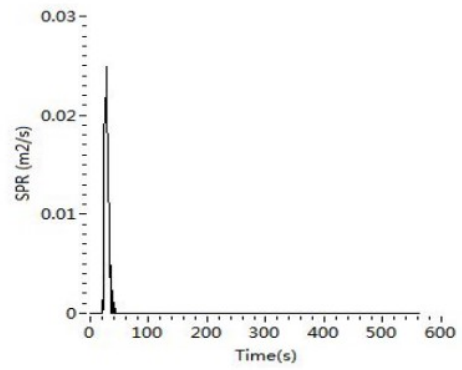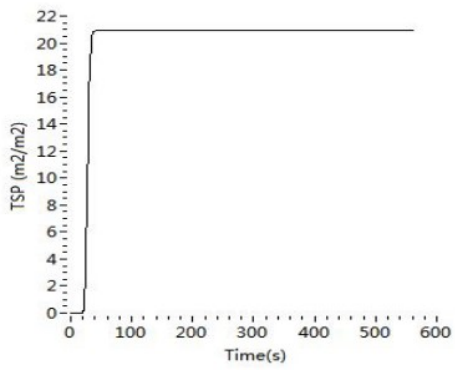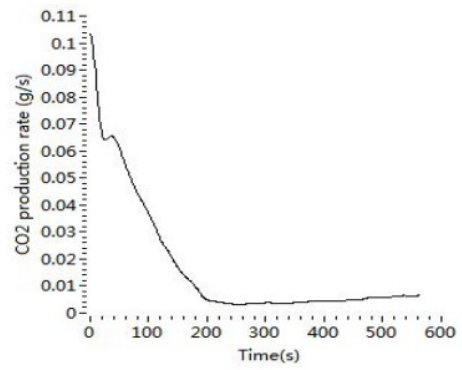

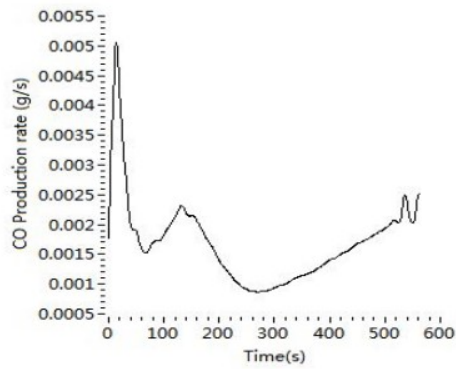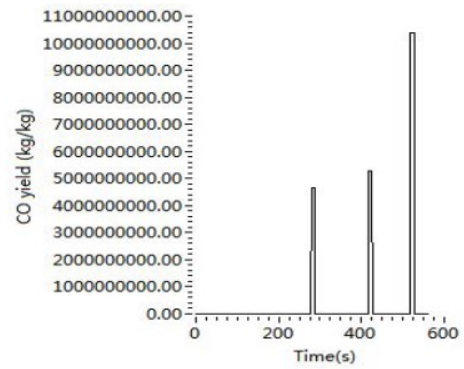

(S20) CCT test data of Si-MgO<sub>0.02</sub>-A-EG<sub>0.03</sub>/PVC

测试结果 (between 12 and 496s)

|                     |                                     |
|---------------------|-------------------------------------|
| 总热释放量               | 13.30MJ/m <sup>2</sup>              |
| 总耗氧量                | 8.97g                               |
| 质量损失                | 1416.65g/m <sup>2</sup>             |
| 平均质量损失率 (mA, 10-90) | 2.56g/(s·m <sup>2</sup> )           |
| 烟总释放量               | 20.96m <sup>2</sup> /m <sup>2</sup> |
| 总产烟量                | 0.19m <sup>2</sup>                  |
| MARHE               | 168.75kw/m <sup>2</sup>             |

|                               | 平均值     | 最大值       | 时间(s) |
|-------------------------------|---------|-----------|-------|
| 热释放率 (kW/m <sup>2</sup> )     | 27.7516 | 145.1179  | 12    |
| 有效燃烧热 (MJ/kg)                 | 9.4813  | 148.4633  | 279   |
| 质量损失率 (g/(s·m <sup>2</sup> )) | 2.927   | 514.5638  | 64    |
| 比消光面积 (m <sup>2</sup> /kg)    | 14.7979 | 1884.9979 | 29    |
| 二氧化碳产量 (kg/kg)                | 0.0605  | 0.1912    | 12    |
| 一氧化碳产量 (kg/kg)                | 0.6146  | 2.7496    | 12    |

测试数据

| 从试样点燃到结束...                   | 1 min   | 2 min   | 3 min   | 4 min   | 5 min   | 0s-12s   | 12s-496s |
|-------------------------------|---------|---------|---------|---------|---------|----------|----------|
| 热释放率 (kW/m <sup>2</sup> )     | 102.058 | 79.1722 | 60.3039 | 46.9076 | 38.7531 | 159.6004 | 26.0567  |
| 有效燃烧热 (MJ/kg)                 | 21.209  | 16.0257 | 14.0283 | 12.7148 | 11.797  | -9.9501  | 8.9023   |
| 质量损失率 (g/(s·m <sup>2</sup> )) | 4.812   | 4.9403  | 4.2987  | 3.6892  | 3.285   | -16.04   | 2.927    |
| 比消光面积 (m <sup>2</sup> /kg)    | 72.6085 | 35.3613 | 27.0927 | 23.6767 | 21.272  | 0        | 0.3722   |
| 二氧化碳产量 (kg/kg)                | 0.0539  | 0.0487  | 0.0541  | 0.0558  | 0.0564  | -0.0306  | 0.0018   |
| 一氧化碳产量 (kg/kg)                | 1.4073  | 1.0729  | 0.936   | 0.848   | 0.7865  | -0.6146  | 0.0163   |

产烟结果

|                        |                                    |
|------------------------|------------------------------------|
| 烟总量: 无火焰阶段 (0s-12s)    | 0.0m <sup>2</sup> /m <sup>2</sup>  |
| 烟总量: 有焰燃烧阶段 (12s-202s) | 21.0m <sup>2</sup> /m <sup>2</sup> |
| 烟总量: 整个测试阶段 (0s-496s)  | 21.0m <sup>2</sup> /m <sup>2</sup> |

(S21) CCT test data of Si-MgO<sub>0.02</sub>-A-EG<sub>0.03</sub>/PVC
